# Supplementary material for: A Longitudinal Study of Stress During Pregnancy, Children’s Sleep and Polygenic Risk for Poor Sleep in the General Pediatric Population
Source: Res Child Adolesc Psychopathol. 2023 Jul 13;51(12):1909–18. doi: 10.1007/s10802-023-01097-2 (PMC10661881; doi:10.1007/s10802-023-01097-2)
Supplement: Supplementary file 1 — Supplementary file1 (DOCX 37 KB) [file 10802_2023_1097_MOESM1_ESM.docx]

Supplementary Information

A Longitudinal Study of Stress During Pregnancy, Children’s Sleep and Polygenic Risk for Poor Sleep in the General Pediatric Population

Desana Kocevska1,2,3, Isabel K. Schuurmans3,4, Charlotte A.M. Cecil2,3,4, Pauline W. Jansen2,3,5, Eus J.W. van Someren1,6,7, Annemarie I. Luik2,4

1Department of Sleep and Cognition, Netherlands Institute for Neuroscience, Amsterdam, Netherlands;
2Department of Child and Adolescent Psychiatry/Psychology, Erasmus MC University Medical Center, Rotterdam, Netherlands;
3Generation R Study, Erasmus MC University Medical Center Rotterdam, Rotterdam, Netherlands;

4Department of Epidemiology, Erasmus MC University Medical Center Rotterdam, Netherlands;
5Department of Psychology, Education, and Child Studies, Erasmus University Rotterdam, Rotterdam, The Netherlands.
6Department of Psychiatry, Amsterdam Public Health Research Institute and Amsterdam Neuroscience research institute, Amsterdam UMC, Vrije Universiteit, Netherlands;
7Department of Integrative Neurophysiology, Center for Neurogenomics and Cognitive Research, Amsterdam Neuroscience, Vrije Universiteit Amsterdam, Netherlands

Journal: Research on Child and Adolescent Psychopathology

Correspondence to: D. Kocevska (d.kocevska@erasmusmc.nl)

**Online Recourse 1: Supplementary Methods**

|  | | | | |
| --- | --- | --- | --- | --- |
|  | Valid range | Instrument | Time Points | Items; risk |
| **Life events** | 0.00-15.00 | Social Readjustment Rating Scale | 20-25w gestation | Your partner or child died; yes |
| A friend or relative died; yes |
| Child, partner or relative was seriously ill; yes |
| You lost your job; yes |
| You had problems at work or school; yes |
| You moved house; yes |
| Your house or car was burgled; yes |
| 12-Item Short Form Health | 20-25w gestation | You were ill (moderate or poor health); yes |
| General questionnaire | 12-20w gestation | This pregnancy was unplanned; yes |
| 20-25w gestation | You experienced vaginal bleeding; yes |
| 30w gestation | You were admitted to hospital (>24 hours); yes |
| You had a test to see if your baby was abnormal; yes |
| You were unhappy about the obstetric care; yes |
| Pregnancy Outcome questionnaire | 12-20w gestation | You were often worried about the health of the baby; yes |
| You were often worried about the pregnancy; yes |
| **Contextual stress** | 0.00-6.00 | Social Readjustment Rating Scale | 20-25w gestation | Your income was reduced; yes |
| Long lasting difficulties questionnaire | 20-25w gestation | Housing adequacy (e.g., too small, lack of privacy); yes |
| You had a major financial problem; yes |
| Material deprivation | 30w gestation | Housing basic living (inadequate heating, no washing machine, or no refrigerator); yes |
| Housing defects (cold or draught, windows are damp inside, or walls or furniture are damp); yes |
| Financial difficulties ; yes |
| **Parental stress** | 0.00-6.00 | Brief symptom inventory | 20-25w gestation | Psychopathology of mother, > 0.71 |
| General questionnaire | Enrollment | Early parenthood; age mother <19 yrs. |
| Education main caregiver; < phase 2 (higher) secondary education |
| 20-25w gestation | You were in trouble with the law; yes |
| Violence offence; yes |
| Public order offence; yes |
| **Interpersonal stress** | 0.00-18.00 | Long lasting difficulties questionnaire | 20-25w gestation | You argued with your partner; yes |
|  | You had arguments with your family or friends; yes |
|  |  | Difficulties in contact with others; yes |
| General questionnaire | Enrollment | Marital status: single |
| 20-25w gestation | Family size; > 3 persons |
| Social Readjustment Rating Scale | 20-25w gestation | You were divorced; yes |
| Family assessment device | 20-25w gestation | Family affection problems; yes |
| Difficulty in making plans; yes |
| Disapproval of other; yes |
| Difficulty in talking about sadness; yes |
| Avoidance of talking about problems; yes |
| Feelings of being unaccepted; yes |
| Unpleasant and painful feelings; yes |
| Inability to solve problems; yes |
| Decision-making is a problem; yes |
| Distrust of each other; yes |
| Conflicts with each other; yes |
| Family support problems; yes |

**Online Recourse 2: Supplement Table 1. Longitudinal association between prenatal stress and mother reported sleep problems between 2 months and 6 years**

|  | | | | | | | | |
| --- | --- | --- | --- | --- | --- | --- | --- | --- |
|  | Main Effect | |  | Slope | |  | Main effect*Slope | |
|  | B (95% CI) | P |  | B (95% CI) | P |  | B (95% CI) | P |
| Prenatal Stress, total score | 0.07 (0.06;0.09) | <0.001 |  | -0.02 (-0.03;-0.02) | <0.001 |  | 0.00002 (-0.0002;0.0003) | 0.844 |
| Life Events | 0.15 (0.11;0.19) | <0.001 |  | -0.02 (-0.02;-0.02) | <0.001 |  | 0.0001 (-0.001;0.001) | 0.683 |
| Contextual Stress | 0.18 (0.14;0.23) | <0.001 |  | -0.02 (-0.02;-0.02) | <0.001 |  | -0.001 (-0.001;0.0004) | 0.277 |
| Parental Stress | 0.32 (0.24;0.41) | <0.001 |  | -0.02 (-0.02;-0.02) | <0.001 |  | 0.001 (-0.001;0.003) | 0.237 |
| Interpersonal Stress | 0.10  (0.08;0.13) | <0.001 |  | -0.03 (-0.03;-0.02) | <0.001 |  | 0.0001 (-0.0004;0.0001) | 0.810 |

Models are adjusted for sex, age at sleep assessment and ethnic origin of the child. Effect estimates are based on a linear mixed model. Main effects represent effects of prenatal stress (domains) scores on repeatedly measured sleep problems; slope represents the effect of age on sleep problems, and the interaction (main effect * slope) represents effect of prenatal stress (domain) scores on changes of sleep problems across age.

**Online Recourse 3: Supplement Table 2. Association between prenatal stress and mother reported sleep duration during the night (n=4,930)**

|  | **Mother reported sleep duration** | | | | | | | |
| --- | --- | --- | --- | --- | --- | --- | --- | --- |
|  | @ 2 months |  |  | @ 2 years |  |  | @ 3 years |  | |
|  | B (95% CI) | P |  | B (95% CI) | P |  | B (95% CI) | P | |
| Prenatal Stress, total score | -0.03 (-0.02;0.04) | 0.325 |  | 0.01 (-0.02;0.04) | 0.501 |  | 0.04 (0.01;0.06) | 0.003 | |
| Life Events | -0.04 (-0.10;0.02) | 0.194 |  | -0.01 (-0.04;0.02) | 0.381 |  | -0.001 (-0.02;0.02) | 0.863 | |
| Contextual Stress | -0.02 (-0.08;0.04) | 0.532 |  | 0.02 (-0.01;0.06) | 0.138 |  | 0.02 (-0.01;0.04) | 0.171 | |
| Parental Stress | -0.04 (-0.10;0.02) | 0.231 |  | 0.04 (0.01;0.08) | 0.008 |  | 0.09 (0.06;0.11) | <0.001 | |
| Interpersonal Stress | -0.01 (-0.08;0.06) | 0.762 |  | 0.003 (-0.02;0.03) | 0.841 |  | 0.03 (0.01;0.06) | 0.005 | |

*Models are adjusted for sex, age at sleep assessment and ethnic origin of the child

**Online Recourse 4: Supplement Table 3. Longitudinal association between prenatal stress and mother reported sleep duration between 2 months and 3 years**

|  | | | | | | | | |
| --- | --- | --- | --- | --- | --- | --- | --- | --- |
|  | Main Effect | |  | Slope | |  | Main effect*Slope | |
|  | B (95% CI) | P |  | B (95% CI) | P |  | B (95% CI) | P |
| Prenatal Stress, total score | -0.06 (-0.08;-0.04) | <0.001 |  | -0.07 (-0.07;-0.06) | <0.001 |  | 0.002 (0.001;0.003) | <0.001 |
| Life Events | -0.16 (-0.22;-0.11) | <0.001 |  | -0.07 (-0.07;-0.06) | <0.001 |  | 0.01 (0.004;0.008) | <0.001 |
| Contextual Stress | -0.12 (-0.18;-0.05) | 0.001 |  | -0.07 (-0.07;-0.06) | <0.001 |  | 0.004 (0.002;0.007) | <0.001 |
| Parental Stress | -0.43 (-0.18;-0.05) | 0.001 |  | -0.07 (-0.07;-0.06) | <0.001 |  | 0.004 (0.002;0.01) | <0.001 |
| Interpersonal Stress | -0.06 (-0.09;-0.03) | <0.001 |  | -0.07 (-0.07;-0.06) | <0.001 |  | 0.002 (0.001;0.003) | <0.001 |

Models are adjusted for sex, age at sleep assessment and ethnic origin of the child. Effect estimates are based on a linear mixed model. Main effects represent effects of prenatal stress (domains) scores on repeatedly measured sleep duration; slope represents the effect of age on sleep duration, and the interaction (main effect * slope) represents effect of prenatal stress (domain) scores on changes of sleep duration across age.

**Online Recourse 5: Supplement Table 4. Association between prenatal stress and mother reported sleep problems, in sample with complete observations (n=2,598)**

|  |  |  |  |  | **Mother reported sleep problems** | | | | | | | | | | | | |  |
| --- | --- | --- | --- | --- | --- | --- | --- | --- | --- | --- | --- | --- | --- | --- | --- | --- | --- | --- |
|  | @ 2 months | | | | |  |  | @ 1.5 years |  |  | @ 2 years |  |  | @ 3 years |  |  | @6 years |  |
|  | B (95% CI) | | | | | P |  | B (95% CI) | P |  | B (95% CI) | P |  | B (95% CI) | P |  | B (95% CI) | P |
| Prenatal Stress, total score | 0.18 (0.11;0.25) | | | | | <0.001 |  | 0.29 (0.22;0.37) | <0.001 |  | 0.36 (0.28;0.44) | <0.001 |  | 0.33 (0.26;0.40) | <0.001 |  | 0.27 (0.22;0.33) | <0.001 |
| Life Events | 0.08 (0.01;0.15) | | | | | 0.021 |  | 0.18 (0.11;0.26) | <0.001 |  | 0.25 (0.17;0.33) | <0.001 |  | 0.22 (0.16;0.30) | <0.001 |  | 0.17 (0.11;0.23) | <0.001 |
| Contextual Stress | 0.13 (0.05;0.19) | | | | | 0.001 |  | 0.19 (0.12;0.26) | <0.001 |  | 0.24 (0.17;0.32) | <0.001 |  | 0.20 (0.12;0.26) | <0.001 |  | 0.15 (0.10;0.21) | <0.001 |
| Parental Stress | -0.03 (-0.09;0.05) | | | | | 0.488 |  | 0.21 (0.13;0.28) | <0.001 |  | 0.24 (0.17;0.32) | <0.001 |  | 0.16  (0.10;0.23) | <0.001 |  | 0.19 (0.13;0.24) | <0.001 |
| Interpersonal Stress | 0.18 (0.10;0.25) | | | | | <0.001 |  | 0.22 (0.14;0.29) | <0.001 |  | 0.25 (0.17;0.32) | <0.001 |  | 0.26 (0.19;0.33) | <0.001 |  | 0.21 (0.16;0.27) | <0.001 |

*Models are adjusted for sex, age at sleep assessment and ethnic origin of the child

| **Online Recourse 6: Supplement Table 5. Association between prenatal stress and mother reported Sleep Duration, in sample with complete observations (n=2,598)** | | | | | | | | | | | | |
| --- | --- | --- | --- | --- | --- | --- | --- | --- | --- | --- | --- | --- |
|  |  |  |  |  | **Mother reported sleep duration** | | | | | | | |
|  | @ 2 months | | | | |  |  | @ 2 years |  |  | @ 3 years |  | |
|  | B (95% CI) | | | | | P |  | B (95% CI) | P |  | B (95% CI) | P | |
| Prenatal Stress, total score | -0.25 (-0.37;-0.13) | | | | | <0.001 |  | -0.06 (-0.10;-0.01) | 0.009 |  | 0.003 (-0.04;0.05) | 0.884 | |
| Life Events | -0.25 (-0.37;-0.10) | | | | | <0.001 |  | -0.04 (-0.08;0.004) | 0.073 |  | 0.01 (-0.04;0.004) | 0.737 | |
| Contextual Stress | -0.09 (-0.21;0.003) | | | | | 0.137 |  | -0.04 (-0.08;0.01) | 0.095 |  | -0.004 (-0.05;0.04) | 0.839 | |
| Parental Stress | -0.23 (-0.34;-0.11) | | | | | <0.001 |  | -0.04 (-0.08;0.01) | 0.098 |  | 0.03 (-0.01;0.16) | 0.164 | |
| Interpersonal Stress | -0.14 (-0.26;-0.02) | | | | | 0.018 |  | -0.04 (-0.08;0.001) | 0.058 |  | -0.01 (-0.05;0.04) | 0.818 | |

*Models are adjusted for sex, age at sleep assessment and ethnic origin

**Online Recourse 7: Supplement Table 6. Association between prenatal stress and mother reported sleep problems, in sample with genetic data (n=2063)**

|  |  |  |  |  | | **Mother reported Sleep Problems** | | | | | | | | | | | |  |
| --- | --- | --- | --- | --- | --- | --- | --- | --- | --- | --- | --- | --- | --- | --- | --- | --- | --- | --- |
|  | @ 2 months | | | |  | |  | @ 1.5 years |  |  | @ 2 years |  |  | @ 3 years |  |  | @6 years |  |
|  | B (95% CI) | | | | P | |  | B (95% CI) | P |  | B (95% CI) | P |  | B (95% CI) | P |  | B (95% CI) | P |
| Prenatal Stress, total score | 0.05 (-0.03;0.13) | | | | 0.129 | |  | 0.14 (0.07;0.23) | <0.001 |  | 0.29 (0.20;0.37) | <0.001 |  | 0.24 (0.16;0.32) | <0.001 |  | 0.25 (0.19;0.32) | <0.001 |
| Life Events | 0.01 (-0.07;0.09) | | | | 0.801 | |  | 0.10 (0.02;0.19) | 0.012 |  | 0.17 (0.10;0.26) | <0.001 |  | 0.14 (0.06;0.22) | 0.001 |  | 0.15 (0.09;0.21) | <0.001 |
| Contextual Stress | 0.06 (-0.03;0.14) | | | | 0.181 | |  | 0.08 (-0.01;0.16) | 0.066 |  | 0.17 (0.09;0.26) | <0.001 |  | 0.17 (0.09;0.25) | <0.001 |  | 0.17 (0.11;0.23) | <0.001 |
| Parental Stress | -0.12 (-0.19;0.03) | | | | 0.004 | |  | 0.15 (0.07;0.23) | <0.001 |  | 0.19 (0.12;0.23) | <0.001 |  | 0.09  (0.004;0.16) | 0.037 |  | 0.13 (0.08;0.19) | <0.001 |
| Interpersonal Stress | 0.07 (-0.01;0.15) | | | | 0.095 | |  | 0.09 (0.01;0.17) | 0.031 |  | 0.21 (0.12;0.29) | <0.001 |  | 0.18 (0.11;0.27) | <0.001 |  | 0.19 (0.13;0.26) | <0.001 |

*Models are adjusted for sex, age at sleep assessment and ethnic origin

**Online Recourse 8: Supplement Table 7. Association between prenatal stress and mother reported sleep duration, in sample with genetic data (n=2063)**

|  |  |  |  |  | **Mother reported Sleep Duration** | | | | | | | |
| --- | --- | --- | --- | --- | --- | --- | --- | --- | --- | --- | --- | --- |
|  | @ 2 months | | | | |  |  | @ 2 years |  |  | @ 3 years |  | |
|  | B (95% CI) | | | | | P |  | B (95% CI) | P |  | B (95% CI) | P | |
| Prenatal Stress, total score | -0.19 (-0.32;0.05) | | | | | 0.032 |  | -0.01 (-0.05;-0.04) | 0.800 |  | 0.02 (-0.06;0.05) | 0.773 | | |
| Life Events | -0.16 (-0.30;-0.04) | | | | | 0.013 |  | 0.03 (-0.02;0.08) | 0.216 |  | 0.03 (-0.01;0.09) | 0.191 | | |
| Contextual Stress | -0.10 (-0.25;-0.05) | | | | | 0.185 |  | -0.01 (-0.05;0.04) | 0.822 |  | -0.02 (-0.07;0.03) | 0.503 | | |
| Parental Stress | -0.14 (-0.27;0.002) | | | | | 0.054 |  | -0.02 (-0.07;0.02) | 0.325 |  | 0.03 (-0.02;0.09) | 0.206 | | |
| Interpersonal Stress | -0.10 (-0.24;0.03) | | | | | 0.124 |  | -0.02 (-0.06;0.03) | 0.371 |  | -0.04 (-0.09;0.02) | 0.168 | | |
| Models are adjusted for sex, age at sleep assessment and ethnic origin | | | | | | | | | | | | | | |
